# Supplementary material for: Intercomparison of fast airborne ozone instruments to measure eddy covariance fluxes: spatial variability in deposition at the ocean surface and evidence for cloud processing
Source: Copernicus journal article supplement (doi:10.5194/amt-17-5731-2024), 2024-09-30
Supplement: Supplementary file 1 [file amt-17-5731-2024-supplement.pdf]

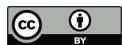

*Supplement of*

## **Intercomparison of fast airborne ozone instruments to measure eddy covariance fluxes: spatial variability in deposition at the ocean surface and evidence for cloud processing**

**Randall Chiu et al.**

*Correspondence to:* Randall Chiu ([randall.chiu@colorado.edu](mailto:randall.chiu@colorado.edu)) and Rainer Volkamer ([rainer.volkamer@colorado.edu](mailto:rainer.volkamer@colorado.edu))

The copyright of individual parts of the supplement might differ from the article licence.

| Date | RF  | Subsection Number | Start Time UTC      | End Time UTC        | starting latitude | starting longitude |
|------|-----|-------------------|---------------------|---------------------|-------------------|--------------------|
| 413  | 3-A | 1                 | 2022-04-13 19:16:43 | 2022-04-13 19:20:13 | 20.1280           | -156.831           |
| 413  |     | 2                 | 2022-04-13 19:24:56 | 2022-04-13 19:31:06 | 20.2879           | -156.971           |
| 413  | 3-B | 1                 | 2022-04-13 20:45:33 | 2022-04-13 20:52:08 | 19.9928           | -156.711           |
| 413  |     | 2                 | 2022-04-13 20:57:53 | 2022-04-13 21:04:06 | 20.2338           | -156.923           |
| 413  |     | 3                 | 2022-04-13 21:14:01 | 2022-04-13 21:16:16 | 20.2172           | -156.853           |
| 413  |     | 4                 | 2022-04-13 21:17:20 | 2022-04-13 21:18:41 | 20.0569           | -156.75            |
| 413  | 3-C | 1                 | 2022-04-13 22:29:35 | 2022-04-13 22:32:36 | 19.9831           | -156.737           |
| 413  |     | 2                 | 2022-04-13 22:38:15 | 2022-04-13 22:44:51 | 20.2377           | -156.926           |
| 413  |     | 3                 | 2022-04-13 22:46:02 | 2022-04-13 22:54:15 | 19.9664           | -156.653           |
| 415  | 4-A | 1                 | 2022-04-15 21:16:20 | 2022-04-15 21:21:46 | 25.9755           | -155.00            |
| 415  |     | 2                 | 2022-04-15 21:22:12 | 2022-04-15 21:25:50 | 26.3548           | -155.00            |
| 416  | 4-B | 1                 | 2022-04-16 00:51:13 | 2022-04-16 00:53:35 | 20.2486           | -152.33            |
| 420  | 5-A | 1                 | 2022-04-20 20:56:06 | 2022-04-20 21:06:01 | 36.6096           | -155.343           |
| 421  | 6-A | 1                 | 2022-04-21 19:39:47 | 2022-04-21 19:44:44 | 59.3743           | -152.177           |
| 422  | 6-B | 1                 | 2022-04-22 02:28:59 | 2022-04-22 02:32:01 | 22.2292           | -155.530           |
| 423  | 7-A | 1                 | 2022-04-23 21:43:30 | 2022-04-23 21:49:20 | 19.9951           | -156.754           |
| 423  |     | 2                 | 2022-04-23 21:52:40 | 2022-04-23 21:57:58 | 20.0846           | -157.041           |
| 423  |     | 3                 | 2022-04-23 22:04:07 | 2022-04-23 22:06:45 | 20.0292           | -156.864           |
| 423  |     | 4                 | 2022-04-23 22:11:24 | 2022-04-23 22:16:08 | 19.9505           | -156.595           |

Table S1. Meteorological conditions during flux legs.

| alt (m) | air speed (m/s) | Ambient T (C) | MBL height (m) | wind (m/s) | qualitative cloudiness | JNO2 (1/s) | JO3 (1/s) | SNPP chlor-a (mg/m <sup>3</sup> ) | SST (C) | NO2 (pptv) | NO (pptv) | CO TDL (ppbv) |
|---------|-----------------|---------------|----------------|------------|------------------------|------------|-----------|-----------------------------------|---------|------------|-----------|---------------|
| 312     | 125             | 21.2          | 800            | 12.0       | moderate low clouds    | 0.00918    | 2.12E-05  | 0.035                             | 21.4    | 55.0       | 24.8      | 94.5          |
| 98.6    | 103             | 23.1          | 800            | 12.0       | moderate low clouds    | 0.00918    | 2.25E-05  | 0.035                             | 21.4    | 42.0       | 21.7      | 94.4          |
| 101     | 107             | 23.3          | 1500           | 11.2       | light clouds           | 0.0101     | 3.72E-05  | 0.035                             | 21.4    | 26.3       | 6.1       | 95            |
| 256     | 104             | 21.8          | 1500           | 12.3       | light clouds           | 0.0102     | 3.88E-05  | 0.035                             | 21.4    | 18.7       | 0         | 94.9          |
| 315     | 103             | 21.1          | 1500           | 13.9       | light clouds           | 0.0111     | 4.42E-05  | 0.035                             | 21.4    | 20.3       | 1.9       | 93.1          |
| 98      | 104             | 23.2          | 1500           | 12.8       | light clouds           | 0.0109     | 4.26E-05  | 0.035                             | 21.4    | 25.2       | 8.5       | 95            |
| 107     | 106             | 23.1          | 1000           | 12.3       | mostly cloudy          | 0.0103     | 4.23E-05  | 0.035                             | 21.4    | 21.4       | 15.4      | 96.3          |
| 889     | 106             | 17.7          | 1000           | 6.8        | mostly cloudy          | 0.011      | 4.74E-05  | 0.035                             | 21.4    | 23.6       | 16.7      | 90            |
| 476     | 107             | 20.9          | 1000           | 3.5        | partly cloudy          | 0.011      | 4.88E-05  | 0.025                             | 24.7    | 25.2       | 18.4      | 93.5          |
| 93.3    | 116             | 21.5          | 1000           | 9.4        | partly cloudy          | 0.0101     | 3.30E-05  | 0.048                             | 18.3    | 30.5       | 7.98      | 117.2         |
| 101     | 120             | 21.4          | 1000           | 8.0        | partly cloudy          | 0.0104     | 3.49E-05  | 0.048                             | 18.3    | 20.3       | 6.11      | 116.5         |
| 98.5    | 115             | 21.7          | 2400           | 10.7       | partly cloudy          | 0.0077     | 2.18E-15  | 0.042                             | 24.1    | NA         | NA        | 106.7         |
| 110     | 117             | 11.9          | 800            | 8.3        | mostly clear           | 0.00996    | 2.81E-05  | 0.112                             | 13.4    | 68.1       | 17.60     | 160           |
| 58      | 108             | 1.5           | 3000           | 5.7        | mostly cloudy          | 0.005      | 3.52E-06  | 1.26                              | 4.9     | 28.1       | 9.42      | 135.3         |
| 116     | 127             | 21.2          | 700            | 9.2        | overcast               | 0.004367   | 5.14E-06  | 0.039                             | 22.2    | 50.5       | 12.9      | 121.4         |
| 116     | 136             | 23.4          | 1700           | 11.7       | mostly sunny           | 0.0107     | 4.76E-05  | 0.0468                            | 18.3    | 9.91       | 10.10     | 100.1         |
| 464     | 119             | 20.3          | 1700           | 11.1       | mostly sunny           | 0.011      | 5.11E-05  | 0.0468                            | 18.3    | 12.9       | 4.25      | 99.8          |
| 778     | 136             | 17.9          | 1700           | 8.0        | mostly sunny           | 0.0113     | 5.38E-05  | 0.0468                            | 24.1    | 27.4       | 2.24      | 133.3         |
| 472     | 126             | 23.4          | 1000           | 3.0        | mostly sunny           | 0.0107     | 4.86E-05  | 0.04765                           | 25.7    | 13         | 0         | 101.6         |

| leg      | Fast O3       |                |                   |       | FAIRO 1       |                |                   |       | FAIRO 2       |                |                   |       |
|----------|---------------|----------------|-------------------|-------|---------------|----------------|-------------------|-------|---------------|----------------|-------------------|-------|
|          | avg.<br>(ppb) | range<br>(ppb) | st. dev.<br>(ppb) | % RSD | avg.<br>(ppb) | range<br>(ppb) | st. dev.<br>(ppb) | % RSD | avg.<br>(ppb) | range<br>(ppb) | st. dev.<br>(ppb) | % RSD |
| RF03-B-4 | 36.6          | 0.9            | 0.40              | 1.1   | 34.4          | 0.7            | 0.35              | 1.0   | 34.5          | 0.8            | 0.38              | 1.1   |
| RF04-B-1 | 24.0          | 1.0            | 0.36              | 1.5   | 21.5          | 0.6            | 0.26              | 1.2   | 21.2          | 1.1            | 0.30              | 1.4   |
| RF07-A-3 | 24.6          | 1.0            | 0.34              | 1.4   | 23.5          | 0.7            | 0.29              | 1.2   | 23.9          | 0.8            | 0.23              | 1.0   |
| RF03-C-1 | 35.8          | 1.2            | 0.43              | 1.2   | 35.1          | 1.1            | 0.38              | 1.1   | 35.0          | 1.6            | 0.45              | 1.3   |
| RF05-A-1 | 53.5          | 3.3            | 0.86              | 1.6   | 53.9          | 1.8            | 0.52              | 1.0   | 53.9          | 2.1            | 0.57              | 1.1   |
| RF04-A-2 | 30.0          | 1.0            | 0.37              | 1.2   | 28.0          | 1.0            | 0.35              | 1.3   | 28.2          | 1.3            | 0.39              | 1.4   |
| RF07-A-4 | 24.0          | 1.6            | 0.42              | 1.8   | 22.8          | 0.9            | 0.30              | 1.3   | 23.1          | 0.9            | 0.22              | 1.0   |
| RF07-A-2 | 23.9          | 1.2            | 0.37              | 1.6   | 23.5          | 1.0            | 0.33              | 1.4   | 23.8          | 0.8            | 0.22              | 0.9   |
| RF03-A-1 | 35.6          | 1.6            | 0.48              | 1.5   | 35.0          | 1.6            | 0.41              | 1.2   | 34.6          | 1.1            | 0.38              | 1.1   |
| RF03-B-3 | 37.0          | 1.7            | 0.44              | 1.2   | 34.7          | 1.6            | 0.44              | 1.3   | 35.0          | 1.8            | 0.44              | 1.3   |
| average  |               |                |                   | 1.4   |               |                |                   | 1.2   |               |                |                   | 1.1   |

Table S2. Summary of instrument precision estimates from low-variability flux legs.

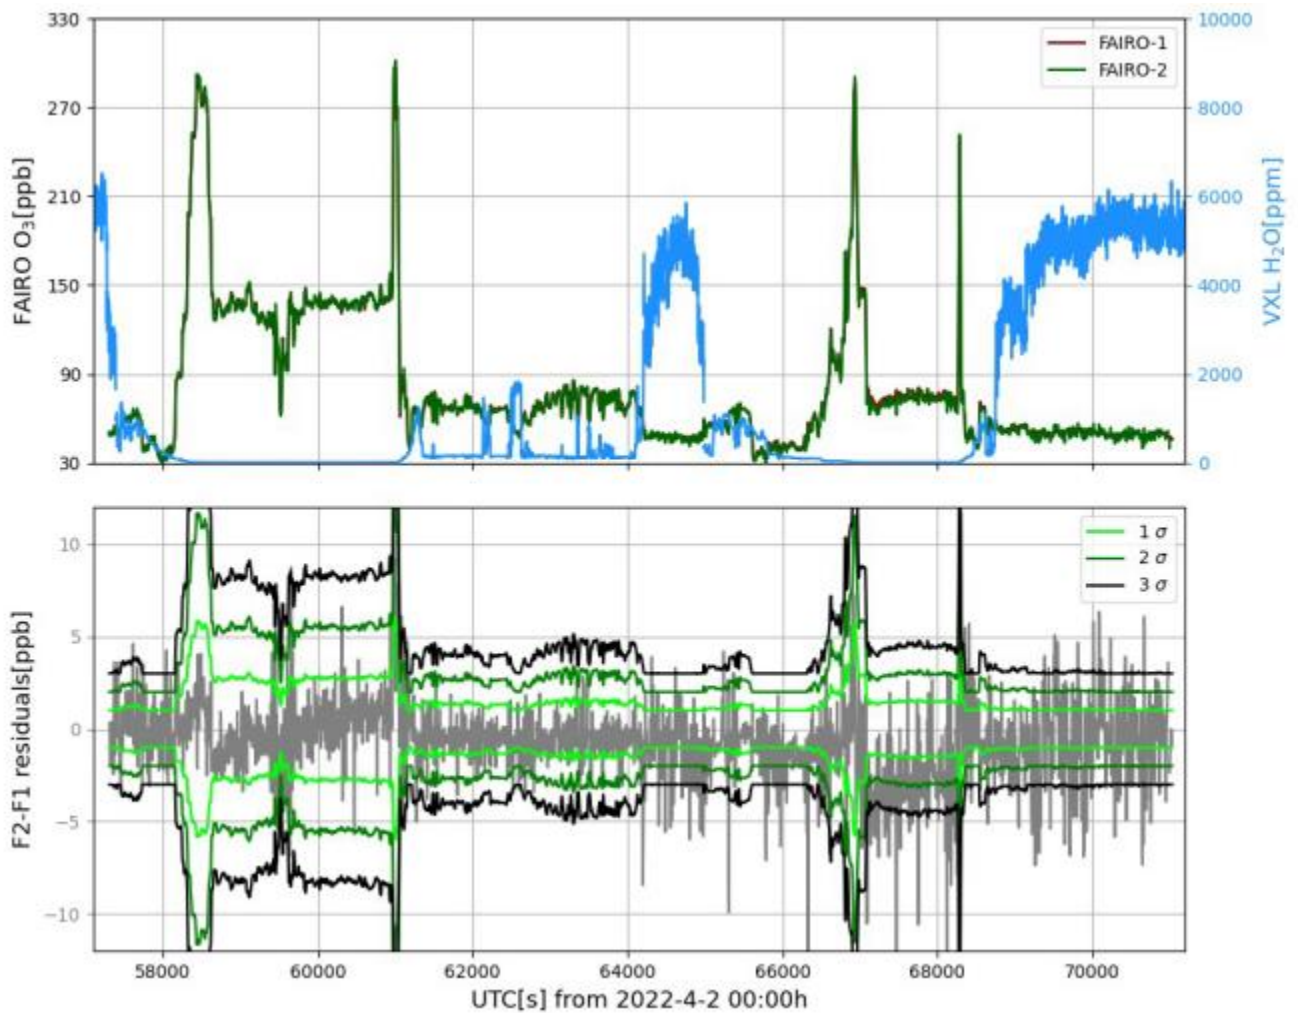

Figure S1: Potential for a small humidity interference of FAIRO uv photometers. At high H<sub>2</sub>O VMR, when considerable RH variability occurs (top panel), a larger variability/noise is observed for O<sub>3</sub> in the difference “FAIRO-1 minus FAIRO-2” (bottom panel), e.g. for RF-01 at 64.000 – 65.000 s or after 69.000 s. This may be due to a (small) H<sub>2</sub>O dependence of the dielectrical constant of air that influences Rayleigh scattering: a rapid increase of humidity leads to a higher H<sub>2</sub>O VMR in the ambient air, corresponding to additional scattering and the retrieved O<sub>3</sub> concentration may be too high; the opposite happens when suddenly dry air is intersected.

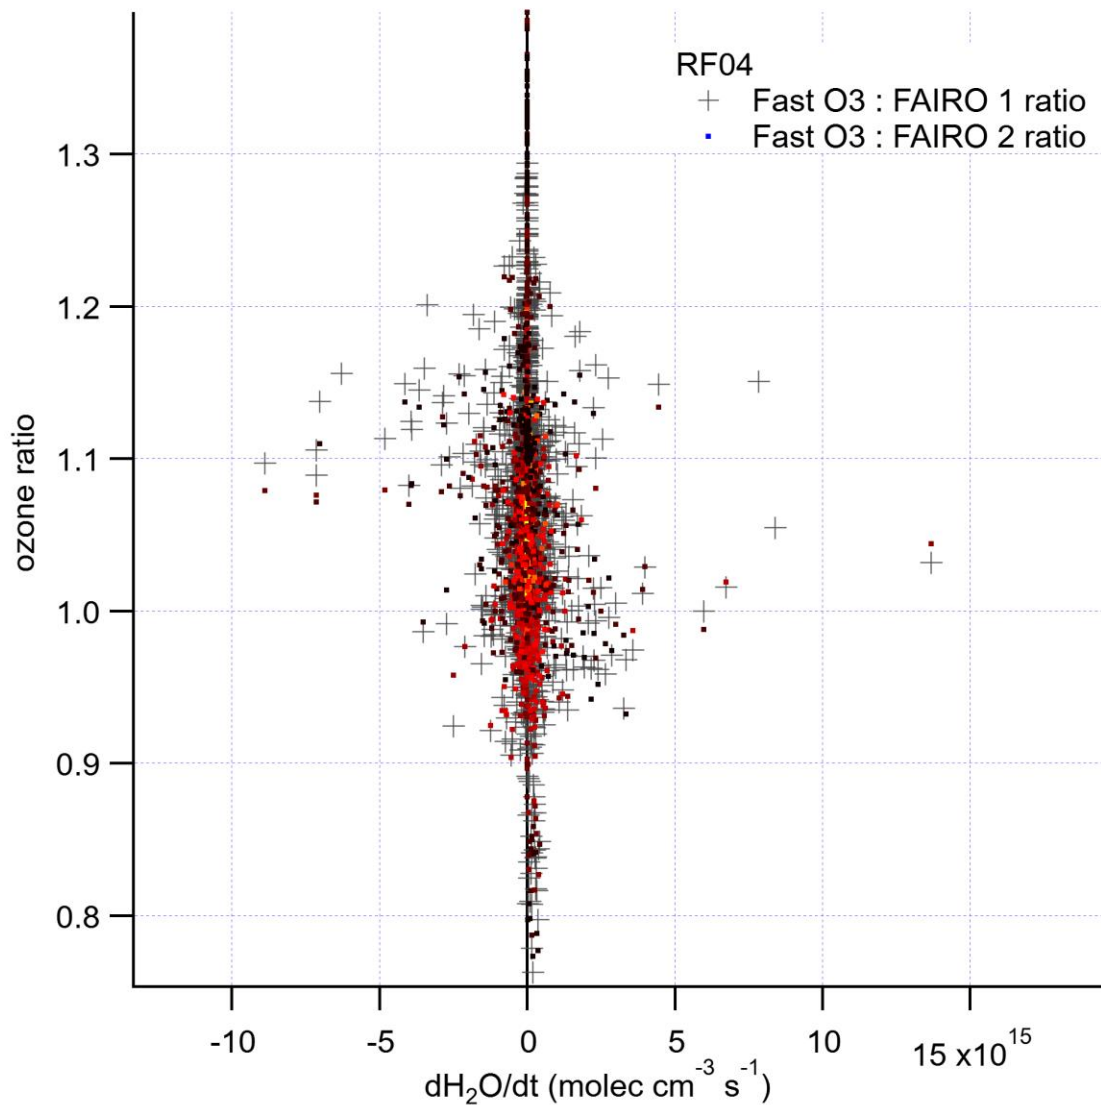

Figure S2: Effect of water vapor changes on Fast O3/FAIRO intercomparison. Ratio of Fast O3 to FAIRO 1 is shown as gray crosses. Ratio of Fast O3 to FAIRO 2 is shown as color-coded dots, with black dots indicating low ozone and hotter colors indicating higher ozone (color scale ends at 100 ppbv, yellow). Comparisons are calculated from data averaged over 10 s. No systematic behavior is observed.

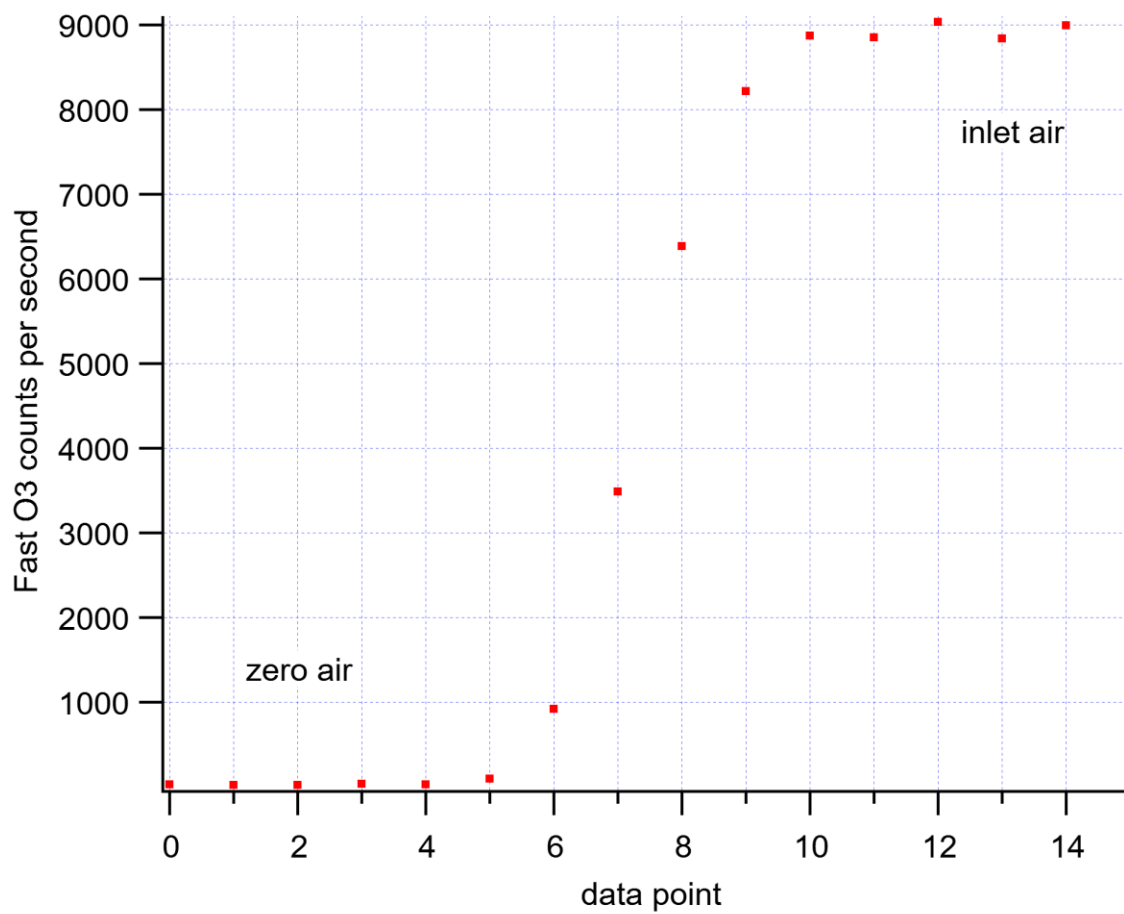

Figure S3: Fast O3 photon counts during valve-switching from zero air back to sampling outside air from the inlet. Data points are collected at 10 Hz.

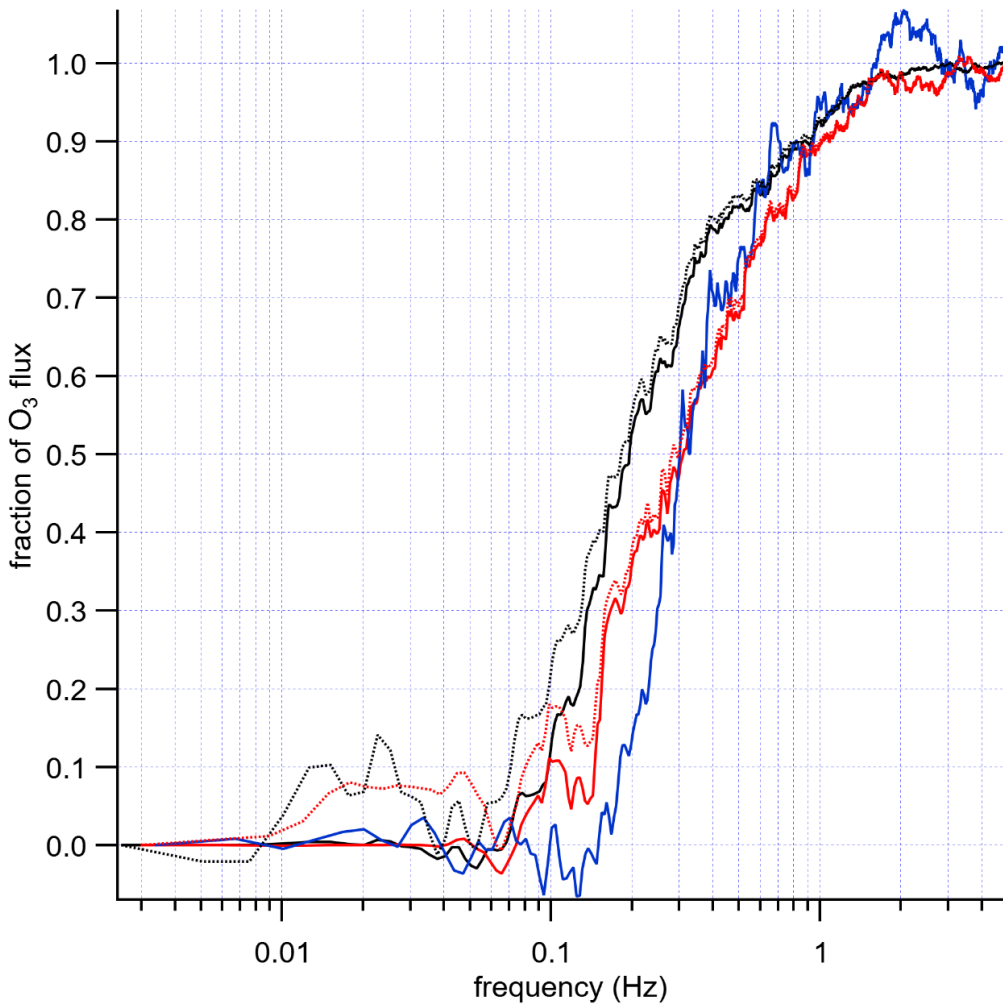

Figure S4: Cumulative frequency graphs (ogives) for RF03-C-2 (black), RF04-A-1 (red), and RF06-A-1 (blue) of the ozone fluxes from the Fast O<sub>3</sub> instrument. Solid lines: detrended to 10 s; dotted lines: no detrending. Detrending eliminates fluxes over >10s time frames. Fluxes at frequencies >1 Hz account for ~10% of total flux. WA flux calculation for RF06-A-1 did not agree with EC flux without detrending, so detrended ogive for RF06-A-1 is not included.
